# Supplementary material
Source: PubMed Central journal article supplement (PMC2772164)
Supplement: NIHMS103141-supplement-1.pdf [file NIHMS103141-supplement-1.pdf]

## Supplementary Information Titles

|                                 |
|---------------------------------|
| <b>Journal:</b> Nature Medicine |
|---------------------------------|

|                              |                                                                                                           |
|------------------------------|-----------------------------------------------------------------------------------------------------------|
| <b>Article Title:</b>        | HETEROTYPIC INTERACTIONS ENABLED BY POLARIZED NEUTROPHIL MICRODOMAINS MEDIATE THROMBO-INFLAMMATORY INJURY |
| <b>Corresponding Author:</b> | Paul S. Frenette and Andres Hidalgo                                                                       |
|                              |                                                                                                           |

| <b>Supplementary Item &amp; Number<br/>(add rows as necessary)</b> | <b>Title or Caption</b>                                                                                                                                                                      |
|--------------------------------------------------------------------|----------------------------------------------------------------------------------------------------------------------------------------------------------------------------------------------|
| Supplementary Figure 1                                             | <b>Elevated expression of <math>\alpha M\beta 2</math> on <i>Selp1g<sup>-/-</sup></i> leukocytes.</b>                                                                                        |
| Supplementary Figure 2                                             | <b>Reduced nRBC capture in mice deficient in C3.</b>                                                                                                                                         |
| Supplementary Figure 3                                             | <b>Specificity of albumin-coated fluosphere capture <i>in vivo</i>.</b>                                                                                                                      |
| Supplementary Figure 4                                             | <b>Fluosphere capture by adherent leukocytes correlates with the level of <math>\alpha M\beta 2</math> expression.</b>                                                                       |
| Supplementary Figure 5                                             | <b>Inhibition of Src kinases protects from lung injury.</b>                                                                                                                                  |
| Supplementary Figure 6                                             | <b><i>In vivo</i> detection of reactive oxygen species (ROS) in adherent leukocytes following anti-H2d infusion.</b>                                                                         |
| Supplementary Figure 7                                             | <b>N-acetyl-cysteine prevents ROS generation by adherent leukocytes and vascular permeability after anti-H2d infusion.</b>                                                                   |
| Supplementary Figure 8                                             | <b>Kinetics of leukocyte recruitment and RBC-leukocyte interactions in SCD mice.</b>                                                                                                         |
| Supplementary Figure 9                                             | <b>Frequency of adherent leukocyte subsets in venules of sickle transgenic mice.</b>                                                                                                         |
| Supplementary Figure 10                                            | <b>Leukocyte recruitment in venules of wild-type, <i>Selp<sup>-/-</sup></i> and <i>Sele<sup>-/-</sup></i> mice reconstituted with hematopoietic stem and progenitor cells from SCD mice.</b> |
| Supplementary Figure 11                                            | <b>Effect of adhesion receptor deficiency and SCD mutation on <math>\alpha M\beta 2</math> activity on adherent leukocytes.</b>                                                              |
|                                                                    |                                                                                                                                                                                              |
| Supplementary Table 1                                              | <b>Hemodynamic parameters in mice analyzed for RBC-leukocyte interactions</b>                                                                                                                |
| Supplementary Table 2                                              | <b>Hemodynamic parameters in mice analyzed for fluosphere capture.</b>                                                                                                                       |
|                                                                    |                                                                                                                                                                                              |

|                               |                                                                                                                                                                                                                                                                                                                                                                                                                                                                                                                                                                 |
|-------------------------------|-----------------------------------------------------------------------------------------------------------------------------------------------------------------------------------------------------------------------------------------------------------------------------------------------------------------------------------------------------------------------------------------------------------------------------------------------------------------------------------------------------------------------------------------------------------------|
| Supplementary Methods         |                                                                                                                                                                                                                                                                                                                                                                                                                                                                                                                                                                 |
| Supplementary Video 1         | <b>nRBC captures are mediated by the leading edge of adherent PMNs.</b> Adherent leukocytes in venules of C57BL/6 mice treated with TNF- $\alpha$ were imaged following the intravenous injection of PE-conjugated anti-L-selectin (red, 0.5 $\mu$ g) and FITC-conjugated anti-LFA-1 (clone M17/4; green, 1 $\mu$ g). L-selectin clusters identify the trailing edge of adherent leukocytes. Brightfield images of nRBC interactions with PMNs in inflamed venules were captured 180 min after cytokine administration.                                         |
| Supplementary Video 2         | <b>Platelets interact mostly with leukocyte microdomains at the leading edge.</b> Platelets were labeled by anti-CD41 (red, 1 $\mu$ g / mouse) and the trailing edge with anti-L-selectin (blue, 0.02 mg/Kg) in a TNF- $\alpha$ -stimulated mouse. Real time is shown in the left upper corner (h:min:s).                                                                                                                                                                                                                                                       |
| Supplementary Video 3         | <b>Regional activation of <math>\alpha</math>M<math>\beta</math>2 integrin at the leading edge of adherent leukocytes mediates fluosphere capture.</b> TNF- $\alpha$ -treated C57BL/6 mice were injected with PE-conjugated anti-L-selectin (red; 0.5 $\mu$ g) to label the trailing edge of adherent leukocytes. Fluosphere interactions with adherent leukocytes in inflamed venules were imaged 180 min after cytokine treatment, immediately upon the injection of albumin-coated fluospheres (green) through a catheter placed in the left carotid artery. |
| Supplementary Video 4a and 4b | <b>Platelet-WBC interactions are markedly induced by anti-H2d administration in Balb/c mice.</b> Platelets were labeled by anti-CD41 (red, 1 $\mu$ g / mouse) and the trailing edge with anti-L-selectin (blue, 0.02 mg/Kg). <b>(a)</b> Sequence of images just before anti-H2d administration. <b>(b)</b> Sequence of images taken after anti-H2d injection. Note the increase in platelet captures by leukocytes and also the interactions of non-labeled RBCs with adherent leukocytes.                                                                      |
